# Supplementary material for: Downregulation of GSTK1 Is a Common Mechanism Underlying Hypertrophic Cardiomyopathy
Source: Front Pharmacol. 2016 Jun 14;7:162. doi: 10.3389/fphar.2016.00162 (PMC4905960; doi:10.3389/fphar.2016.00162)
Supplement: Supplementary file 5 [file Table_3.XLSX]

## Sheet: Co-expression
Table S3-1 Gene pairs co-expressed in the functional interaction networks related to the five common DEGs.
Gene 1	Gene 2	Weight	Type	Source
ACTA2	TGFBR3	0.00854731	Co-expression	Arijs-Rutgeerts-2009
COL1A2	COL3A1	0.00828884	Co-expression	Arijs-Rutgeerts-2009
COL1A2	FBLN1	0.00629192	Co-expression	Arijs-Rutgeerts-2009
COL1A2	POSTN	0.00587031	Co-expression	Arijs-Rutgeerts-2009
COL1A2	TGFBI	0.00155926	Co-expression	Arijs-Rutgeerts-2009
COL3A1	TGFBI	0.00623423	Co-expression	Arijs-Rutgeerts-2009
CYR61	CTGF	0.0107193	Co-expression	Arijs-Rutgeerts-2009
RTN3	UQCRC1	0.0066828	Co-expression	Arijs-Rutgeerts-2009
RTN3	TGFBI	0.0115887	Co-expression	Bahr-Bowler-2013
COL1A2	COL3A1	0.0188259	Co-expression	Bild-Nevins-2006 B
COL1A2	CTGF	0.0152749	Co-expression	Bild-Nevins-2006 B
COL1A2	POSTN	0.015295	Co-expression	Bild-Nevins-2006 B
COL3A1	ACTA2	0.00848471	Co-expression	Bild-Nevins-2006 B
COL3A1	CTGF	0.0117228	Co-expression	Bild-Nevins-2006 B
COL3A1	POSTN	0.0114831	Co-expression	Bild-Nevins-2006 B
CTGF	POSTN	0.0114697	Co-expression	Bild-Nevins-2006 B
CYR61	CTGF	0.0180589	Co-expression	Bild-Nevins-2006 B
FBLN1	CTGF	0.0194032	Co-expression	Bild-Nevins-2006 B
IGFBP7	CTGF	0.0136413	Co-expression	Bild-Nevins-2006 B
IGFBP7	POSTN	0.0101312	Co-expression	Bild-Nevins-2006 B
PDZRN3	RTN4	0.016282	Co-expression	Bild-Nevins-2006 B
PDZRN3	TGFBR3	0.0215235	Co-expression	Bild-Nevins-2006 B
TGFBI	POSTN	0.00802366	Co-expression	Bild-Nevins-2006 B
TGFBI	POSTN	0.00737839	Co-expression	Boldrick-Relman-2002
ACTA2	POSTN	0.0272332	Co-expression	Burington-Shaughnessy-2008
COL1A2	IGFBP7	0.0228672	Co-expression	Burington-Shaughnessy-2008
CYR61	ACTA2	0.0268103	Co-expression	Burington-Shaughnessy-2008
IGFBP7	PDZRN3	0.0279365	Co-expression	Burington-Shaughnessy-2008
ACTA2	IGFBP7	0.00768619	Co-expression	Chen-Brown-2002
ADIPOQ	POSTN	0.00921633	Co-expression	Chen-Brown-2002
COL3A1	CTGF	0.00659236	Co-expression	Chen-Brown-2002
CYR61	CTGF	0.00585892	Co-expression	Chen-Brown-2002
FBLN1	COL3A1	0.00944053	Co-expression	Chen-Brown-2002
FBLN1	CTGF	0.00929104	Co-expression	Chen-Brown-2002
FBLN1	PDZRN3	0.00774273	Co-expression	Chen-Brown-2002
PDZRN3	CTGF	0.00582531	Co-expression	Chen-Brown-2002
ACTA2	CTGF	0.01335	Co-expression	Cheok-Evans-2003
ACTR1B	UQCRC1	0.00526414	Co-expression	Cheok-Evans-2003
UQCRC1	ARHGDIA	0.00239865	Co-expression	Cheok-Evans-2003
ACTA2	GSTK1	0.0076995	Co-expression	Gysin-McMahon-2012
COL1A2	COL3A1	0.0119981	Co-expression	Gysin-McMahon-2012
COL3A1	POSTN	0.0107741	Co-expression	Gysin-McMahon-2012
IGFBP7	PDZRN3	0.0161422	Co-expression	Gysin-McMahon-2012
ACTA2	CTGF	0.0176471	Co-expression	Innocenti-Brown-2011
ACTA2	IGFBP7	0.00616041	Co-expression	Innocenti-Brown-2011
COL1A2	ACTA2	0.00937759	Co-expression	Innocenti-Brown-2011
COL1A2	COL3A1	0.0137575	Co-expression	Innocenti-Brown-2011
COL1A2	IGFBP7	0.00387557	Co-expression	Innocenti-Brown-2011
COL1A2	POSTN	0.0080746	Co-expression	Innocenti-Brown-2011
CYR61	CTGF	0.0292415	Co-expression	Innocenti-Brown-2011
FAM134B	RTN4	0.00332864	Co-expression	Innocenti-Brown-2011
IGFBP7	CTGF	0.00666914	Co-expression	Innocenti-Brown-2011
IGFBP7	PDZRN3	0.00889209	Co-expression	Innocenti-Brown-2011
IGFBP7	CTGF	0.00491457	Co-expression	Kang-Willman-2010
RTN3	UQCRC1	0.00381217	Co-expression	Kang-Willman-2010
COL1A2	COL3A1	0.00746226	Co-expression	Mallon-McKay-2013
COL3A1	POSTN	0.00684416	Co-expression	Mallon-McKay-2013
CYR61	CTGF	0.0191317	Co-expression	Mallon-McKay-2013
FBLN1	COL3A1	0.00749549	Co-expression	Mallon-McKay-2013
ACTA2	TGFBR3	0.0186399	Co-expression	Ramaswamy-Golub-2001
ACTR1B	RTN4	0.00691032	Co-expression	Ramaswamy-Golub-2001
COL1A2	COL3A1	0.0209905	Co-expression	Ramaswamy-Golub-2001
COL1A2	POSTN	0.0232545	Co-expression	Ramaswamy-Golub-2001
COL1A2	TGFBI	0.0180604	Co-expression	Ramaswamy-Golub-2001
COL3A1	POSTN	0.0186801	Co-expression	Ramaswamy-Golub-2001
COL3A1	TGFBI	0.0149527	Co-expression	Ramaswamy-Golub-2001
CYR61	ACTA2	0.0178276	Co-expression	Ramaswamy-Golub-2001
CYR61	TGFBR3	0.0275055	Co-expression	Ramaswamy-Golub-2001
TGFBI	POSTN	0.0170534	Co-expression	Ramaswamy-Golub-2001
UQCRC2	UQCRC1	0.0111353	Co-expression	Ramaswamy-Golub-2001
ACTR1B	UQCRC1	0.0098043	Co-expression	Rieger-Chu-2004
ARHGDIA	RTN4	0.00517418	Co-expression	Rieger-Chu-2004
IGFBP7	PDZRN3	0.0163825	Co-expression	Rieger-Chu-2004
COL1A2	COL3A1	0.00945882	Co-expression	Roth-Zlotnik-2006
COL1A2	FBLN1	0.0104177	Co-expression	Roth-Zlotnik-2006
CYR61	CTGF	0.0121223	Co-expression	Roth-Zlotnik-2006
CYR61	TGFBR3	0.00483613	Co-expression	Roth-Zlotnik-2006
IGFBP7	CTGF	0.00977513	Co-expression	Roth-Zlotnik-2006
IGFBP7	TGFBR3	0.00501781	Co-expression	Roth-Zlotnik-2006
PDZRN3	TGFBR3	0.00703081	Co-expression	Roth-Zlotnik-2006
RTN3	RTN4	0.00705092	Co-expression	Roth-Zlotnik-2006
TGFBR3	CTGF	0.00537388	Co-expression	Roth-Zlotnik-2006
UQCRC1	MYH7	0.00441248	Co-expression	Roth-Zlotnik-2006
UQCRC1	RTN4IP1	0.0092237	Co-expression	Roth-Zlotnik-2006
ACTA2	CTGF	0.0144901	Co-expression	Salaverria-Siebert-2011
ACTR1B	GSTK1	0.024582	Co-expression	Salaverria-Siebert-2011
ADIPOQ	TGFBR3	0.0128278	Co-expression	Salaverria-Siebert-2011
COL1A2	ACTA2	0.00892097	Co-expression	Salaverria-Siebert-2011
COL1A2	COL3A1	0.011272	Co-expression	Salaverria-Siebert-2011
COL1A2	CTGF	0.0057543	Co-expression	Salaverria-Siebert-2011
COL1A2	CYR61	0.00795884	Co-expression	Salaverria-Siebert-2011
COL1A2	FBLN1	0.00981801	Co-expression	Salaverria-Siebert-2011
COL1A2	PDZRN3	0.00467806	Co-expression	Salaverria-Siebert-2011
COL1A2	POSTN	0.0113381	Co-expression	Salaverria-Siebert-2011
COL1A2	TGFBI	0.00568565	Co-expression	Salaverria-Siebert-2011
COL3A1	CTGF	0.0132273	Co-expression	Salaverria-Siebert-2011
COL3A1	PDZRN3	0.0114244	Co-expression	Salaverria-Siebert-2011
COL3A1	POSTN	0.0287168	Co-expression	Salaverria-Siebert-2011
CTGF	POSTN	0.0154507	Co-expression	Salaverria-Siebert-2011
CYR61	CTGF	0.0197929	Co-expression	Salaverria-Siebert-2011
PDZRN3	POSTN	0.0126507	Co-expression	Salaverria-Siebert-2011
RTN3	RTN4	0.00871394	Co-expression	Salaverria-Siebert-2011
RTN3	UQCRC1	0.00940513	Co-expression	Salaverria-Siebert-2011
ACTA2	CTGF	0.015236	Co-expression	Wang-Maris-2006
ACTA2	POSTN	0.0202729	Co-expression	Wang-Maris-2006
COL1A2	ACTA2	0.0252762	Co-expression	Wang-Maris-2006
COL1A2	COL3A1	0.0239865	Co-expression	Wang-Maris-2006
COL1A2	POSTN	0.0249399	Co-expression	Wang-Maris-2006
COL3A1	ACTA2	0.01805	Co-expression	Wang-Maris-2006
COL3A1	CTGF	0.0117368	Co-expression	Wang-Maris-2006
COL3A1	POSTN	0.0163946	Co-expression	Wang-Maris-2006
CTGF	POSTN	0.012966	Co-expression	Wang-Maris-2006
CYR61	CTGF	0.0116849	Co-expression	Wang-Maris-2006
CYR61	IGFBP7	0.00940719	Co-expression	Wang-Maris-2006
FAM134B	RTN4	0.0112	Co-expression	Wang-Maris-2006
IGFBP7	CTGF	0.00868029	Co-expression	Wang-Maris-2006
ACTR1B	MYH7	0.00470821	Co-expression	Wu-Garvey-2007
ARHGDIA	MYH7	0.00471762	Co-expression	Wu-Garvey-2007
COL1A2	COL3A1	0.0169332	Co-expression	Wu-Garvey-2007
FAM134B	CTGF	0.010989	Co-expression	Wu-Garvey-2007
FAM134B	TGFBR3	0.00875331	Co-expression	Wu-Garvey-2007
TGFBR3	CTGF	0.0126835	Co-expression	Wu-Garvey-2007
UQCRC1	IGFBP7	0.00633674	Co-expression	Wu-Garvey-2007
UQCRC2	RTN4	0.00532226	Co-expression	Wu-Garvey-2007

## Sheet: physical interaction
Table S3-2 Gene pairs with physical interaction in the functional interaction networks related to the five common DEGs.
Gene 1	Gene 2	Weight	Type	Source
FBLN1	CTGF	0.131665	Physical interactions	BIOGRID-SMALL-SCALE-STUDIES
RTN4IP1	RTN4	0.194645	Physical interactions	BIOGRID-SMALL-SCALE-STUDIES
UQCRC1	RTN4	0.0822849	Physical interactions	BIOGRID-SMALL-SCALE-STUDIES
UQCRC2	RTN4	0.0620637	Physical interactions	BIOGRID-SMALL-SCALE-STUDIES
UQCRC2	UQCRC1	0.0614691	Physical interactions	Ewing-Figeys-2007
IGFBP7	RTN4	0.170124	Physical interactions	Havugimana-Emili-2012
LINGO1	RTN4R	0.0565167	Physical interactions	IREF-BIND
RTN4IP1	RTN4	0.111992	Physical interactions	IREF-BIND
RTN4R	RTN4	0.0298459	Physical interactions	IREF-BIND
UQCRC1	RTN4	0.111992	Physical interactions	IREF-BIND
UQCRC2	RTN4	0.111992	Physical interactions	IREF-BIND
ADIPOQ	GSTK1	0.359156	Physical interactions	IREF-DIP
COL1A2	TGFBI	0.0070522	Physical interactions	IREF-HPRD
LINGO1	RTN4R	0.025631	Physical interactions	IREF-HPRD
RTN3	RTN4	0.00431886	Physical interactions	IREF-HPRD
RTN4IP1	RTN4	0.00983889	Physical interactions	IREF-HPRD
RTN4IP1	RTN4R	0.0267199	Physical interactions	IREF-HPRD
RTN4R	RTN4	0.0078619	Physical interactions	IREF-HPRD
UQCRC1	RTN4	0.0106056	Physical interactions	IREF-HPRD
UQCRC2	RTN4	0.0141307	Physical interactions	IREF-HPRD
UQCRC2	UQCRC1	0.0517678	Physical interactions	IREF-HPRD
RTN3	RTN4	0.00465399	Physical interactions	IREF-INTACT
UQCRC2	UQCRC1	0.044933	Physical interactions	IREF-INTACT
COL1A2	TGFBI	0.00585922	Physical interactions	IREF-OPHID
LINGO1	RTN4R	0.0382178	Physical interactions	IREF-OPHID
RTN3	RTN4	0.00453987	Physical interactions	IREF-OPHID
UQCRC1	RTN4	0.00635484	Physical interactions	IREF-OPHID
UQCRC2	RTN4	0.010809	Physical interactions	IREF-OPHID
UQCRC2	UQCRC1	0.0216301	Physical interactions	IREF-OPHID

## Sheet: predicted
Table S3-3 Gene pairs predicted in the functional interaction networks related to the five common DEGs.
Gene 1	Gene 2	Weight	Type	Source
RTN4R	RTN4	0.071323	Predicted	I2D-MGI-Mouse2Human
RTN4R	RTN4	0.151582	Predicted	I2D-MINT-Mouse2Human
PDZRN3	POSTN	0.310273	Predicted	Stuart-Kim-2003

## Sheet: Pathway
Table S3-4 Gene pairs involved in the same pathways in the functional interaction networks related to the five common DEGs.
Gene 1	Gene 2	Weight	Type	Source
ARHGDIA	LINGO1	0.167776	Pathway	PATHWAYCOMMONS-NCI_NATURE
ARHGDIA	RTN4R	0.167776	Pathway	PATHWAYCOMMONS-NCI_NATURE
LINGO1	RTN4R	0.299277	Pathway	PATHWAYCOMMONS-NCI_NATURE
TGFBR3	CTGF	0.197373	Pathway	PATHWAYCOMMONS-NCI_NATURE
UQCRC2	UQCRC1	0.16849	Pathway	PATHWAYCOMMONS-REACTOME
ACTA2	MYH7	0.0745561	Pathway	Wu-Stein-2010
ACTR1B	MYH7	0.119551	Pathway	Wu-Stein-2010
ARHGDIA	LINGO1	0.163608	Pathway	Wu-Stein-2010
ARHGDIA	RTN4	0.239536	Pathway	Wu-Stein-2010
ARHGDIA	RTN4R	0.163608	Pathway	Wu-Stein-2010
CGN	MYH7	0.168625	Pathway	Wu-Stein-2010
LINGO1	RTN4	0.460641	Pathway	Wu-Stein-2010
LINGO1	RTN4R	0.314627	Pathway	Wu-Stein-2010
RTN4R	RTN4	0.460641	Pathway	Wu-Stein-2010
TGFBR3	CTGF	0.406212	Pathway	Wu-Stein-2010
UQCRC2	UQCRC1	0.183971	Pathway	Wu-Stein-2010

## Sheet: co-localization
Table S3-5 Gene pairs co-localized in the functional interaction networks related to the five common DEGs.
Gene 1	Gene 2	Weight	Type	Source
ACTA2	CTGF	0.0190833	Co-localization	Johnson-Shoemaker-2003
COL1A2	ACTA2	0.0102629	Co-localization	Johnson-Shoemaker-2003
COL1A2	COL3A1	0.0165659	Co-localization	Johnson-Shoemaker-2003
COL1A2	CTGF	0.0142237	Co-localization	Johnson-Shoemaker-2003
COL1A2	POSTN	0.0130281	Co-localization	Johnson-Shoemaker-2003
COL3A1	POSTN	0.01955	Co-localization	Johnson-Shoemaker-2003
CYR61	CTGF	0.0226523	Co-localization	Johnson-Shoemaker-2003
CYR61	IGFBP7	0.0114776	Co-localization	Johnson-Shoemaker-2003
FBLN1	TGFBR3	0.0107314	Co-localization	Johnson-Shoemaker-2003
IGFBP7	TGFBR3	0.0127173	Co-localization	Johnson-Shoemaker-2003
UQCRC1	MYH7	0.0147534	Co-localization	Johnson-Shoemaker-2003
UQCRC2	MYH7	0.00720098	Co-localization	Johnson-Shoemaker-2003
UQCRC2	UQCRC1	0.0163913	Co-localization	Johnson-Shoemaker-2003
ACTA2	CTGF	0.0118965	Co-localization	Schadt-Shoemaker-2004
COL1A2	ACTA2	0.0150206	Co-localization	Schadt-Shoemaker-2004
COL1A2	COL3A1	0.0164464	Co-localization	Schadt-Shoemaker-2004
COL1A2	CTGF	0.0120695	Co-localization	Schadt-Shoemaker-2004
COL1A2	FBLN1	0.0130163	Co-localization	Schadt-Shoemaker-2004
COL3A1	ACTA2	0.0138442	Co-localization	Schadt-Shoemaker-2004
COL3A1	CTGF	0.0102881	Co-localization	Schadt-Shoemaker-2004
CYR61	ACTA2	0.0116005	Co-localization	Schadt-Shoemaker-2004
CYR61	CTGF	0.014826	Co-localization	Schadt-Shoemaker-2004
FBLN1	ACTA2	0.0135076	Co-localization	Schadt-Shoemaker-2004
FBLN1	COL3A1	0.0109494	Co-localization	Schadt-Shoemaker-2004
FBLN1	CTGF	0.0121791	Co-localization	Schadt-Shoemaker-2004
FBLN1	CYR61	0.0115794	Co-localization	Schadt-Shoemaker-2004

## Sheet: shared protein domains
Table S3-6 Gene pairs with shared protein domains in the functional interaction networks related to the five common DEGs.
Gene 1	Gene 2	Weight	Type	Source
ACTR1B	ACTA2	0.0169669	Shared protein domains	INTERPRO
CGN	MYH7	0.0172007	Shared protein domains	INTERPRO
COL1A2	COL3A1	0.0154492	Shared protein domains	INTERPRO
COL3A1	CTGF	0.00384587	Shared protein domains	INTERPRO
COL3A1	CYR61	0.00384588	Shared protein domains	INTERPRO
CYR61	CTGF	0.0222215	Shared protein domains	INTERPRO
CYR61	IGFBP7	0.0048976	Shared protein domains	INTERPRO
FAM134B	RTN3	0.0689216	Shared protein domains	INTERPRO
FAM134B	RTN4	0.0689216	Shared protein domains	INTERPRO
IGFBP7	CTGF	0.00489759	Shared protein domains	INTERPRO
RTN3	RTN4	0.0689216	Shared protein domains	INTERPRO
TGFBI	POSTN	0.160394	Shared protein domains	INTERPRO
UQCRC2	UQCRC1	0.0794162	Shared protein domains	INTERPRO
ACTR1B	ACTA2	0.0127993	Shared protein domains	PFAM
CGN	MYH7	0.0162323	Shared protein domains	PFAM
COL1A2	ADIPOQ	0.00384493	Shared protein domains	PFAM
COL1A2	COL3A1	0.0117435	Shared protein domains	PFAM
COL3A1	CTGF	0.00457493	Shared protein domains	PFAM
COL3A1	CYR61	0.00457489	Shared protein domains	PFAM
CYR61	CTGF	0.0131397	Shared protein domains	PFAM
CYR61	IGFBP7	0.00467851	Shared protein domains	PFAM
FAM134B	RTN3	0.0524254	Shared protein domains	PFAM
FAM134B	RTN4	0.0524254	Shared protein domains	PFAM
IGFBP7	CTGF	0.00467856	Shared protein domains	PFAM
LINGO1	RTN4R	0.00229035	Shared protein domains	PFAM
RTN3	RTN4	0.0524254	Shared protein domains	PFAM
TGFBI	POSTN	0.182762	Shared protein domains	PFAM
UQCRC2	UQCRC1	0.0604067	Shared protein domains	PFAM

## Sheet: Score
Table S3-7 Score of genes in the functional interaction networks related to the five common DEGs.
Gene	Score	Description
RTN4R	0.56	reticulon 4 receptor [Source:HGNC Symbol;Acc:18601]
TGFBR3	0.43	transforming growth factor, beta receptor III [Source:HGNC Symbol;Acc:11774]
LINGO1	0.36	leucine rich repeat and Ig domain containing 1 [Source:HGNC Symbol;Acc:21205]
ADIPOQ	0.29	adiponectin, C1Q and collagen domain containing [Source:HGNC Symbol;Acc:13633]
TGFBI	0.29	transforming growth factor, beta-induced, 68kDa [Source:HGNC Symbol;Acc:11771]
PDZRN3	0.28	PDZ domain containing ring finger 3 [Source:HGNC Symbol;Acc:17704]
RTN4IP1	0.25	reticulon 4 interacting protein 1 [Source:HGNC Symbol;Acc:18647]
ARHGDIA	0.18	Rho GDP dissociation inhibitor (GDI) alpha [Source:HGNC Symbol;Acc:678]
IGFBP7	0.17	insulin-like growth factor binding protein 7 [Source:HGNC Symbol;Acc:5476]
ACTA2	0.16	actin, alpha 2, smooth muscle, aorta [Source:HGNC Symbol;Acc:130]
CGN	0.16	cingulin [Source:HGNC Symbol;Acc:17429]
UQCRC1	0.16	ubiquinol-cytochrome c reductase core protein I [Source:HGNC Symbol;Acc:12585]
UQCRC2	0.15	ubiquinol-cytochrome c reductase core protein II [Source:HGNC Symbol;Acc:12586]
CYR61	0.15	cysteine-rich, angiogenic inducer, 61 [Source:HGNC Symbol;Acc:2654]
COL3A1	0.13	collagen, type III, alpha 1 [Source:HGNC Symbol;Acc:2201]
FBLN1	0.13	fibulin 1 [Source:HGNC Symbol;Acc:3600]
RTN3	0.12	reticulon 3 [Source:HGNC Symbol;Acc:10469]
ACTR1B	0.11	ARP1 actin-related protein 1 homolog B, centractin beta (yeast) [Source:HGNC Symbol;Acc:168]
COL1A2	0.11	collagen, type I, alpha 2 [Source:HGNC Symbol;Acc:2198]
FAM134B	0.11	family with sequence similarity 134, member B [Source:HGNC Symbol;Acc:25964]
